# Supplementary material for: 3R-NbS2 as a highly stable anode for sodium-ion batteries
Source: Royal Society of Chemistry journal article supplement (doi:10.1039/d3cc05548e), 2024-01-01
Supplement: d3cc05548e1.pdf [file d3cc05548e1.pdf]

## Supporting Information

### **3R-NbS<sub>2</sub> as a Highly Stable Anode Material for Sodium-ion Batteries**

*Savithri Vishwanathan,<sup>a,b</sup> Pallellappa Chithaiah,<sup>c</sup> H. S. S. Ramakrishna Matte<sup>a,\*</sup> and*

*C. N. R. Rao<sup>c\*</sup>*

- a. Energy Materials Laboratory, Centre for Nano and Soft Matter Sciences, Bangalore 562162, India.
- b. Manipal Academy of Higher Education (MAHE), Manipal 576104, India.
- c. New Chemistry Unit, International Centre for Materials Science and School of Advanced Materials, Jawaharlal Nehru Centre for Advanced Scientific Research, Jakkur PO, Bangalore-560064, India.

\*Email: [matte@cens.res.in](mailto:matte@cens.res.in) and [cnrrao@jncasr.ac.in](mailto:cnrrao@jncasr.ac.in)

## Experimental section

### Synthesis of Nb-HDA complex

A previously reported procedure was followed to synthesize the Nb–HDA complex.<sup>14</sup> The Nb–HDA complex was prepared using niobium(V) ethoxide (Nb(OC<sub>2</sub>H<sub>5</sub>)<sub>5</sub>, 99.95%, Sigma Aldrich), hydrogen peroxide (30%, H<sub>2</sub>O<sub>2</sub>), and 1-hexadecylamine (C<sub>16</sub>H<sub>33</sub>NH<sub>2</sub>, HDA) in a glass beaker. 25 mL of H<sub>2</sub>O<sub>2</sub> solution was added to 1 mL of Nb(OC<sub>2</sub>H<sub>5</sub>)<sub>5</sub> ( $4 \times 10^{-3}$  mol) yielding niobium(V) ethoxide dispersion. 3.76 g of HDA ( $15 \times 10^{-3}$  mol) was dissolved in 5 mL of ethanol at 70 °C and poured into the niobium(V) ethoxide dispersion. Nb–HDA complex was formed spontaneously in the form of a yellow foam along with the generation of heat. The Nb–HDA complex was purified and dried at room temperature and was then employed for the preparation of 3R-NbS<sub>2</sub> nanosheets.

### Synthesis of 3R-NbS<sub>2</sub> nanosheets

The as-prepared Nb–HDA complex was taken in a quartz boat and placed in a quartz tube far from the heating zone of the furnace. Maintaining a continuous flow of N<sub>2</sub> gas, the temperature was increased to 950 °C. The quartz boat was then pushed into the hot zone of the furnace using a magnet and the flow rates of H<sub>2</sub>S and N<sub>2</sub> gases were programmed to 35 and 65 cm<sup>3</sup> min<sup>-1</sup>, respectively. The boat remained in the hot zone for 30 min. Afterwards, the boat was pulled away from the hot zone while the flow rates of N<sub>2</sub> and H<sub>2</sub>S gases were changed to 85 and 10 cm<sup>3</sup> min<sup>-1</sup>, respectively, for 30 min.

### Characterization

The X-ray diffraction pattern (XRD) was acquired using a Cu K $\alpha$  source ( $\lambda = 0.154178$  nm). The Raman spectrum was obtained using a Jobin Yvon LabRam HR spectrometer with a 514 nm Ar laser. X-ray photoelectron spectra (XPS) measurements were carried out using an Omicron nanotechnology spectrometer with Mg K $\alpha$  as the X-ray source. Field emission scanning electron microscopy (FESEM) was carried out using Tescan and Bruker MIRA 3 and Nova Nano SEM 600. The transmission electron microscope (TEM) images were obtained using JEOL JEM 2100 Plus and TALOS F200S G2. Dynamic light scattering (DLS) measurements were carried out using Malvern Nano ZS.

## **Electrochemical measurements**

2032-type coin cells were fabricated in an Ar-filled glovebox with 3R-NbS<sub>2</sub> as working electrode, Na metal as counter electrode using glass fibre as separator. A slurry was prepared by grinding 3R-NbS<sub>2</sub>, conducting carbon and sodium polyacrylate (PAA) binder in 70:15:15 ratio in deionized (DI) water for 30 min. Blade-coating technique is employed to fabricate thin film of 30 μm thickness on a carbon coated Al (Al-C) foil, followed by drying in a vacuum oven at 80 °C for 24 h. 1 M NaClO<sub>4</sub> in ethylene carbonate (EC) and propylene carbonate (PC) mixed solvent in the ratio (1:1) was used as the electrolyte. Neware BTS-4000 battery tester was employed to perform the GCD experiments at different current densities in the voltage range 0.01-2.5 V (vs. Na/Na<sup>+</sup>). Metrohm Autolab PGSTAT302N electrochemical workstation was used to carry out electrochemical impedance spectroscopy (EIS) and cyclic voltammetry (CV) measurements. The values of specific capacities and current densities have been determined considering the mass of the active material.

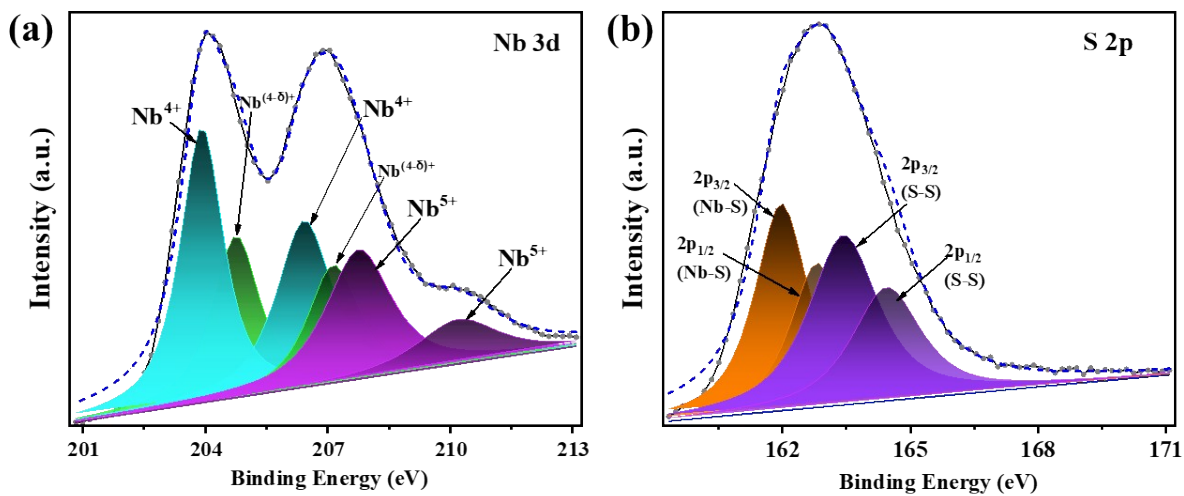

Figure S1 (a) Nb 3d and (b) S 2p XPS spectra of 3R-NbS<sub>2</sub>.

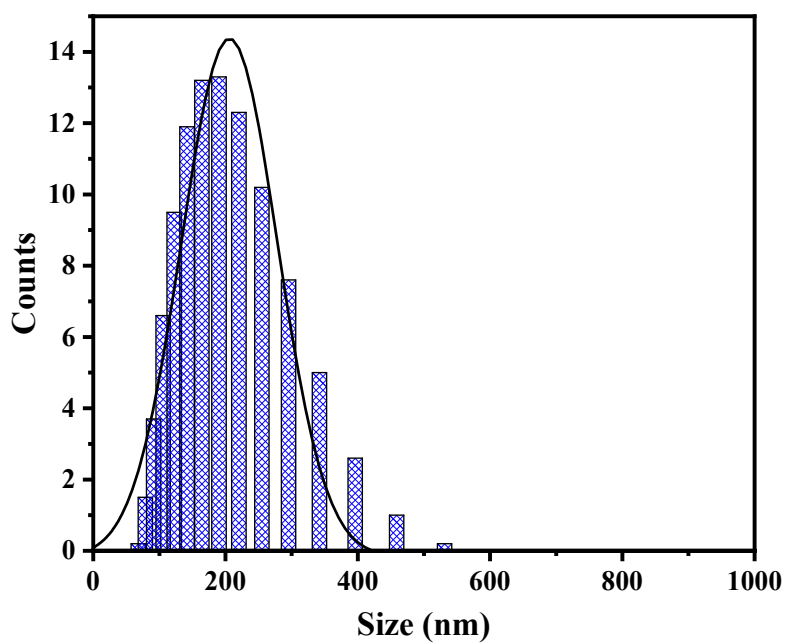

Figure S2. Particle size measurement of 3R-NbS<sub>2</sub> nanosheets by DLS.

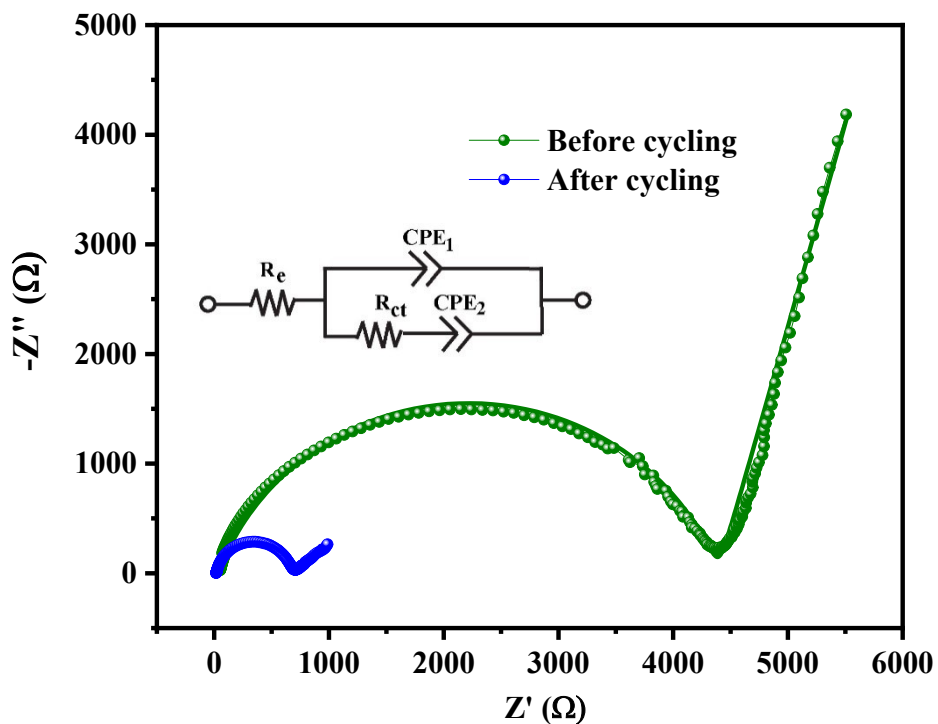

Figure S3. EIS spectra before and after CV cycles at 0.1 mV s<sup>-1</sup>.

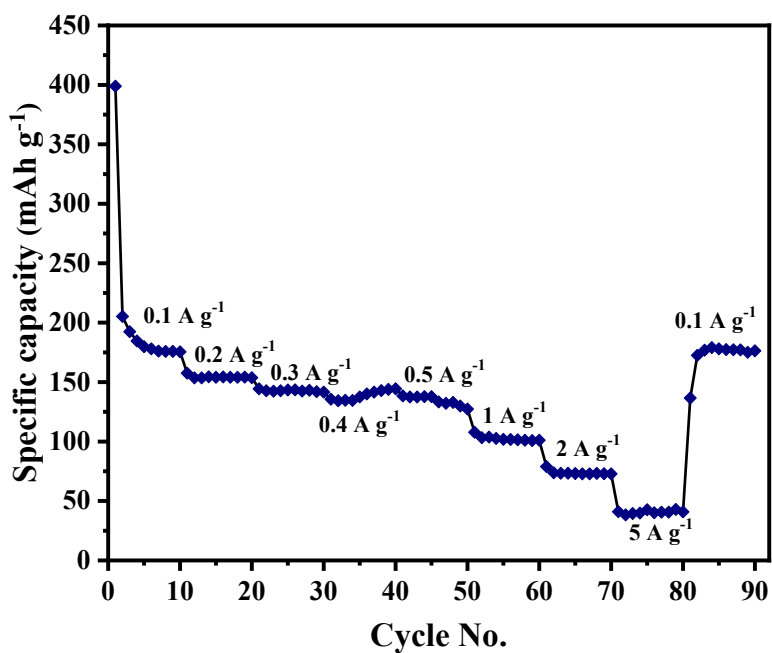

Figure S4. High rate performance of NbS<sub>2</sub> SIB anode.

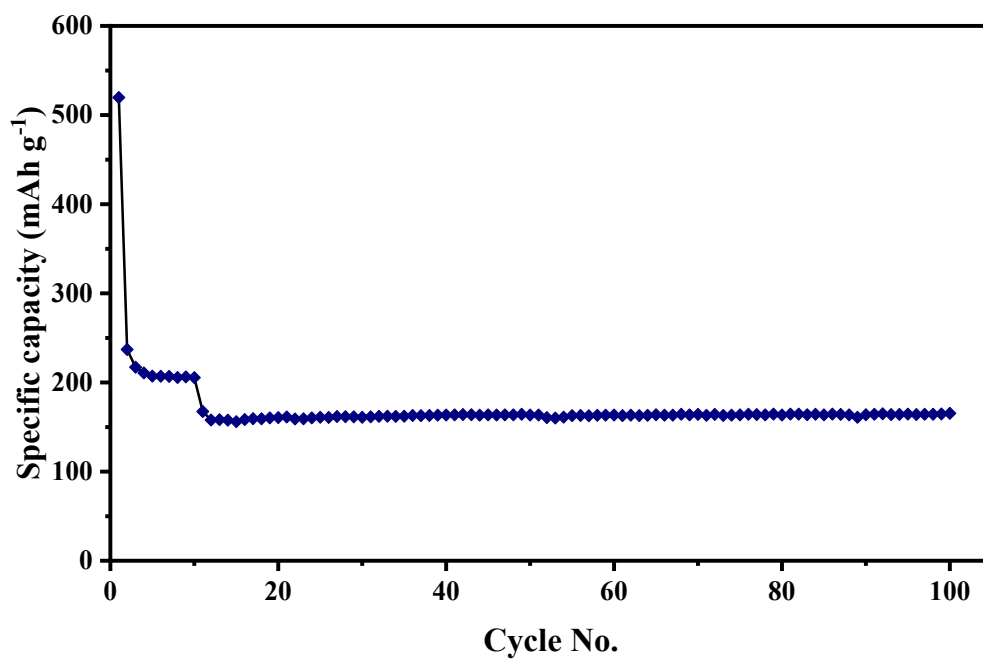

Figure S5. Pre-cycling step at  $0.1 \text{ A g}^{-1}$  (10 cycles) before cycling at  $0.5 \text{ A g}^{-1}$

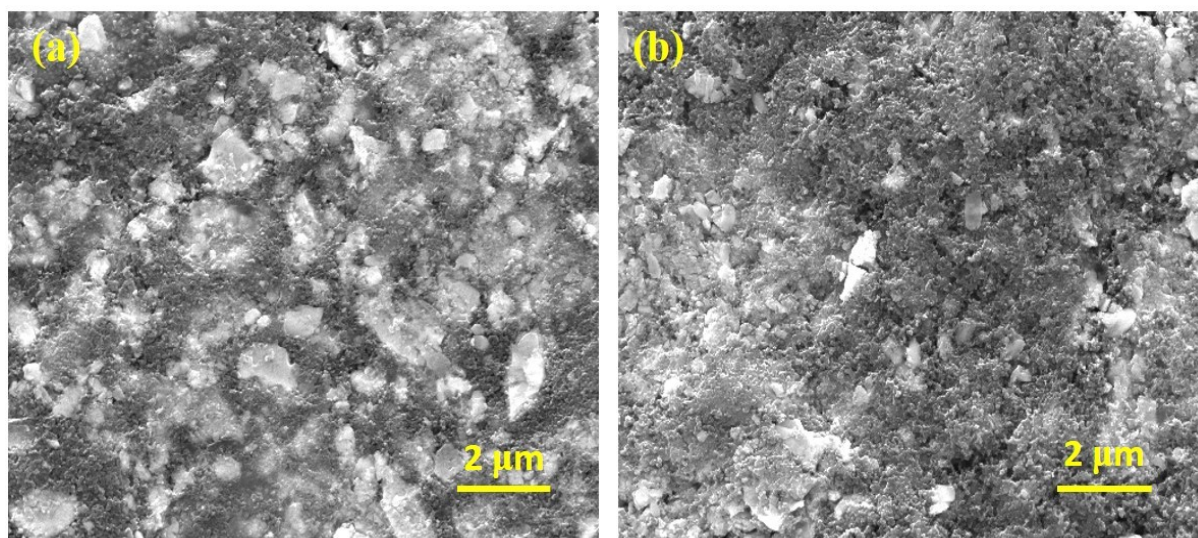

Figure S6. SEM of NbS<sub>2</sub> electrode (a) before cycling and (b) after 2500 cycles.

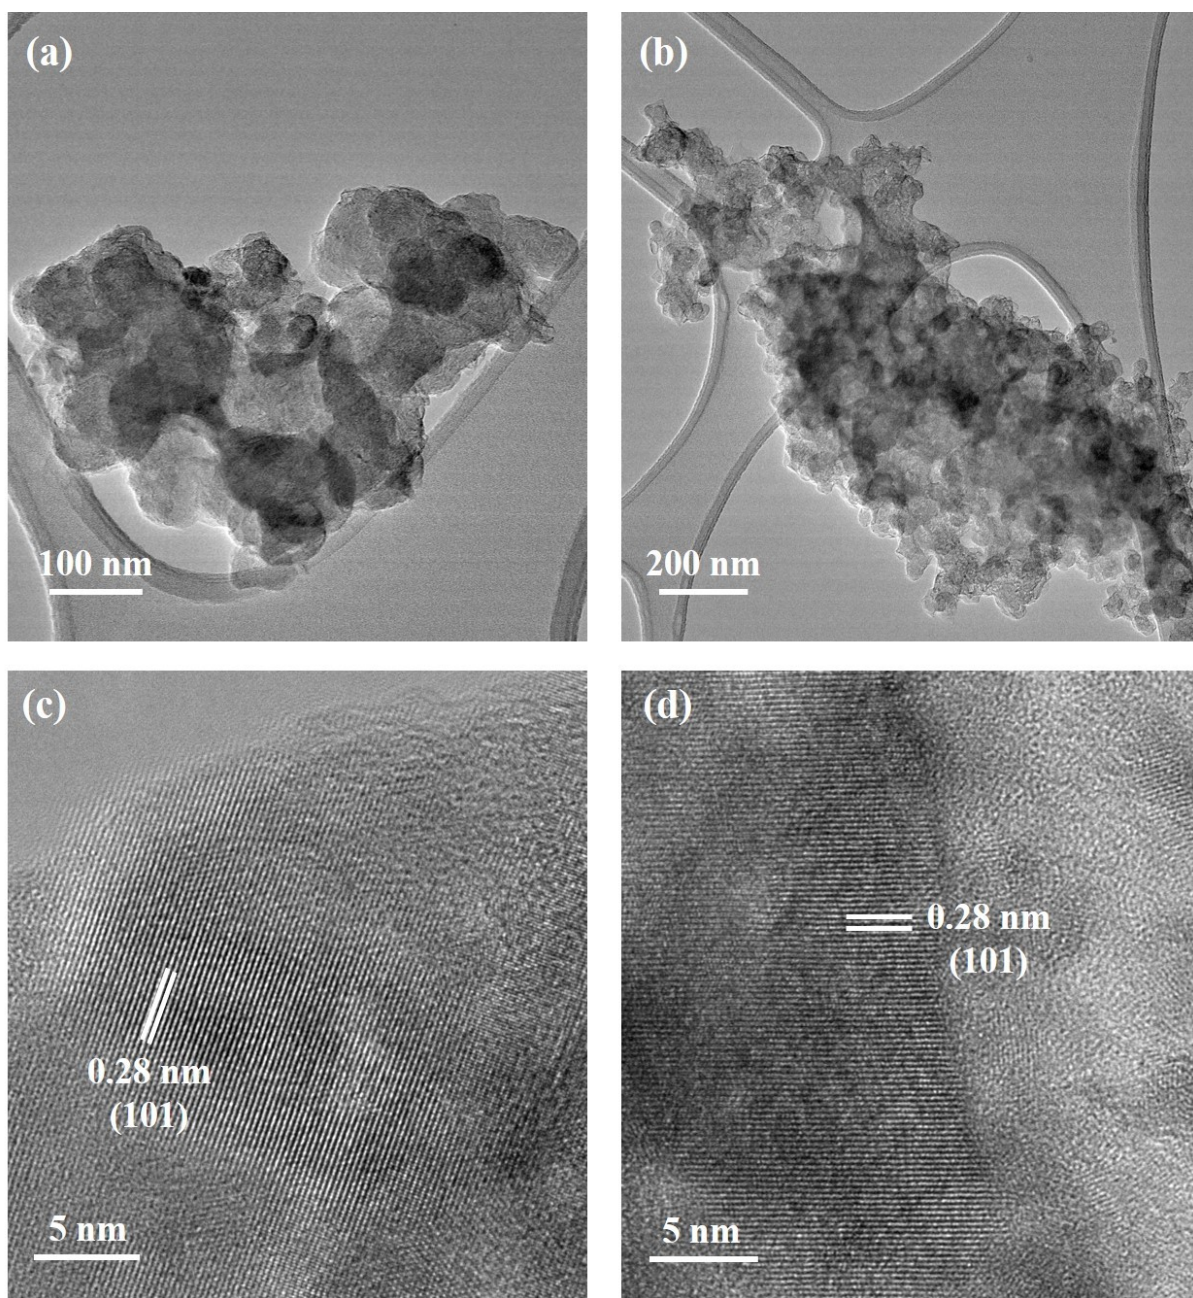

Figure S7. (a,b) TEM images of NbS<sub>2</sub> electrodes before and after 2500 cycles respectively. (c,d) HRTEM images of NbS<sub>2</sub> electrodes before and after 2500 cycles respectively

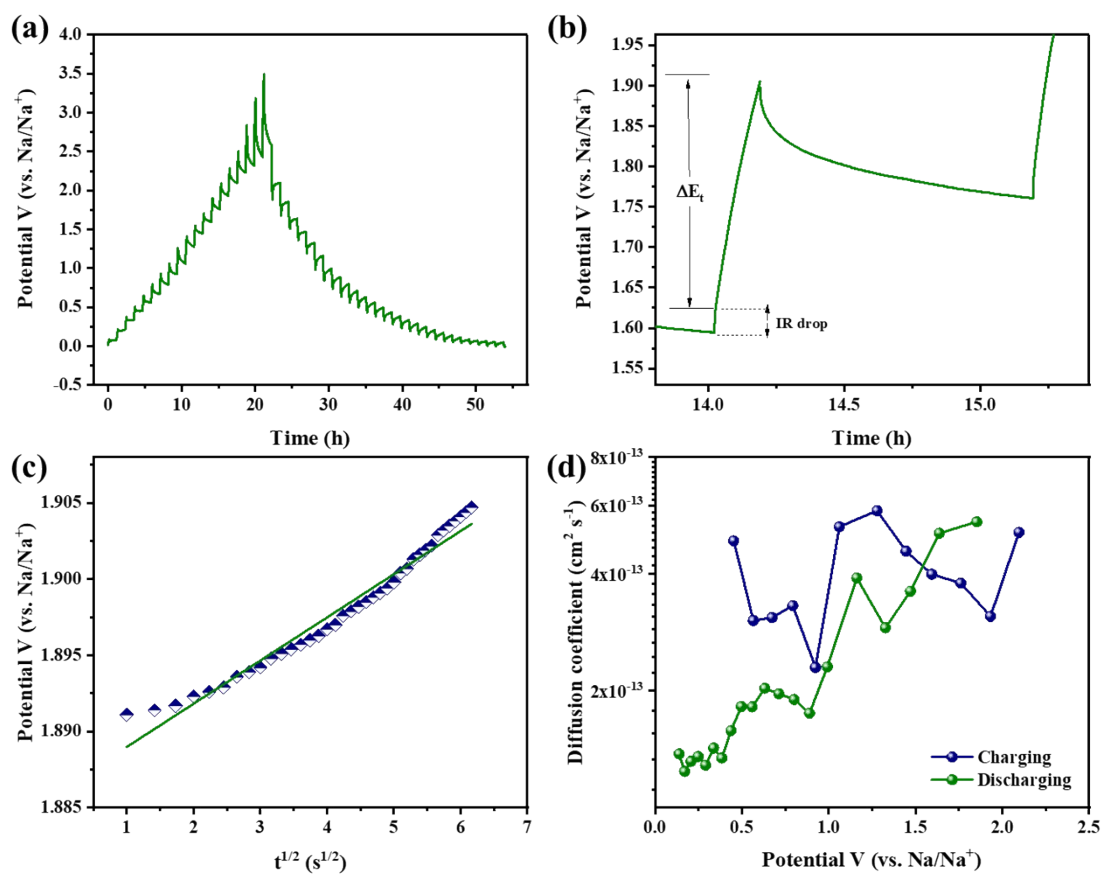

Figure S8. (a) GITT plot of NbS<sub>2</sub>/SIB anode, (b) Magnified view of charging step during GITT, (c)  $\Delta E_t$ -vs- $t^{1/2}$  dependence, (d) diffusion coefficient of anode during charging and discharging.
